# Supplementary material for: High catalytic activity for CO oxidation on single Fe atom stabilized in graphene vacancies
Source: Royal Society of Chemistry journal article supplement (doi:10.1039/c6ra14476d), 2016-01-01
Supplement: c6ra14476d1.pdf [file c6ra14476d1.pdf]

**Supporting information:**

**Fig.1.** The minimum energy profiles and the configurations of different states for CO oxidation reaction on Fe/DG sheet, including (a) CO + O<sub>2</sub> reaction by the LH mechanism, (b) CO + O<sub>2</sub> = CO<sub>2</sub> + O<sub>ads</sub> and (c) CO + O<sub>ads</sub> reaction by the ER mechanism. Red, Green, and black balls represent O, Fe and C atoms, respectively.

**Fig.2.** The minimum energy profiles and the configurations of different states for CO oxidation reaction on Fe/DG sheet, including (a) CO + O<sub>2</sub> and (b) CO<sub>3</sub> + CO reactions by the ER mechanism. Red, green, and black balls represent O, Fe and C atoms, respectively.

**Fig.3.** The minimum energy profiles and the configurations of different states for CO oxidation reaction on Fe/DG sheet, including (a) the dissociative adsorption of O<sub>2</sub> molecule and (b) 2CO + 2O<sub>ads</sub> reactions by the ER mechanism. Red, green, and black balls represent O, Fe and C atoms, respectively.

Table S1. The adsorption energy (E<sub>ads</sub>, in eV) of individual CO (or O<sub>2</sub>) molecule and coadsorbed O<sub>2</sub> + CO molecules on metal embedded graphene sheets (M-gra, M = Al, Au, Cu, Pd and Fe).

| M-gra  | CO   | O <sub>2</sub> | O <sub>2</sub> + CO |
|--------|------|----------------|---------------------|
| Al-gra | 0.83 | 1.57           | 1.95                |
| Au-gra | 1.53 | 1.34           | 1.82                |
| Cu-gra | 1.71 | 2.67           | 3.29                |
| Pd-gra | 1.07 | 1.13           | 1.90                |
| Fe-gra | 1.13 | 1.88           | 2.10                |

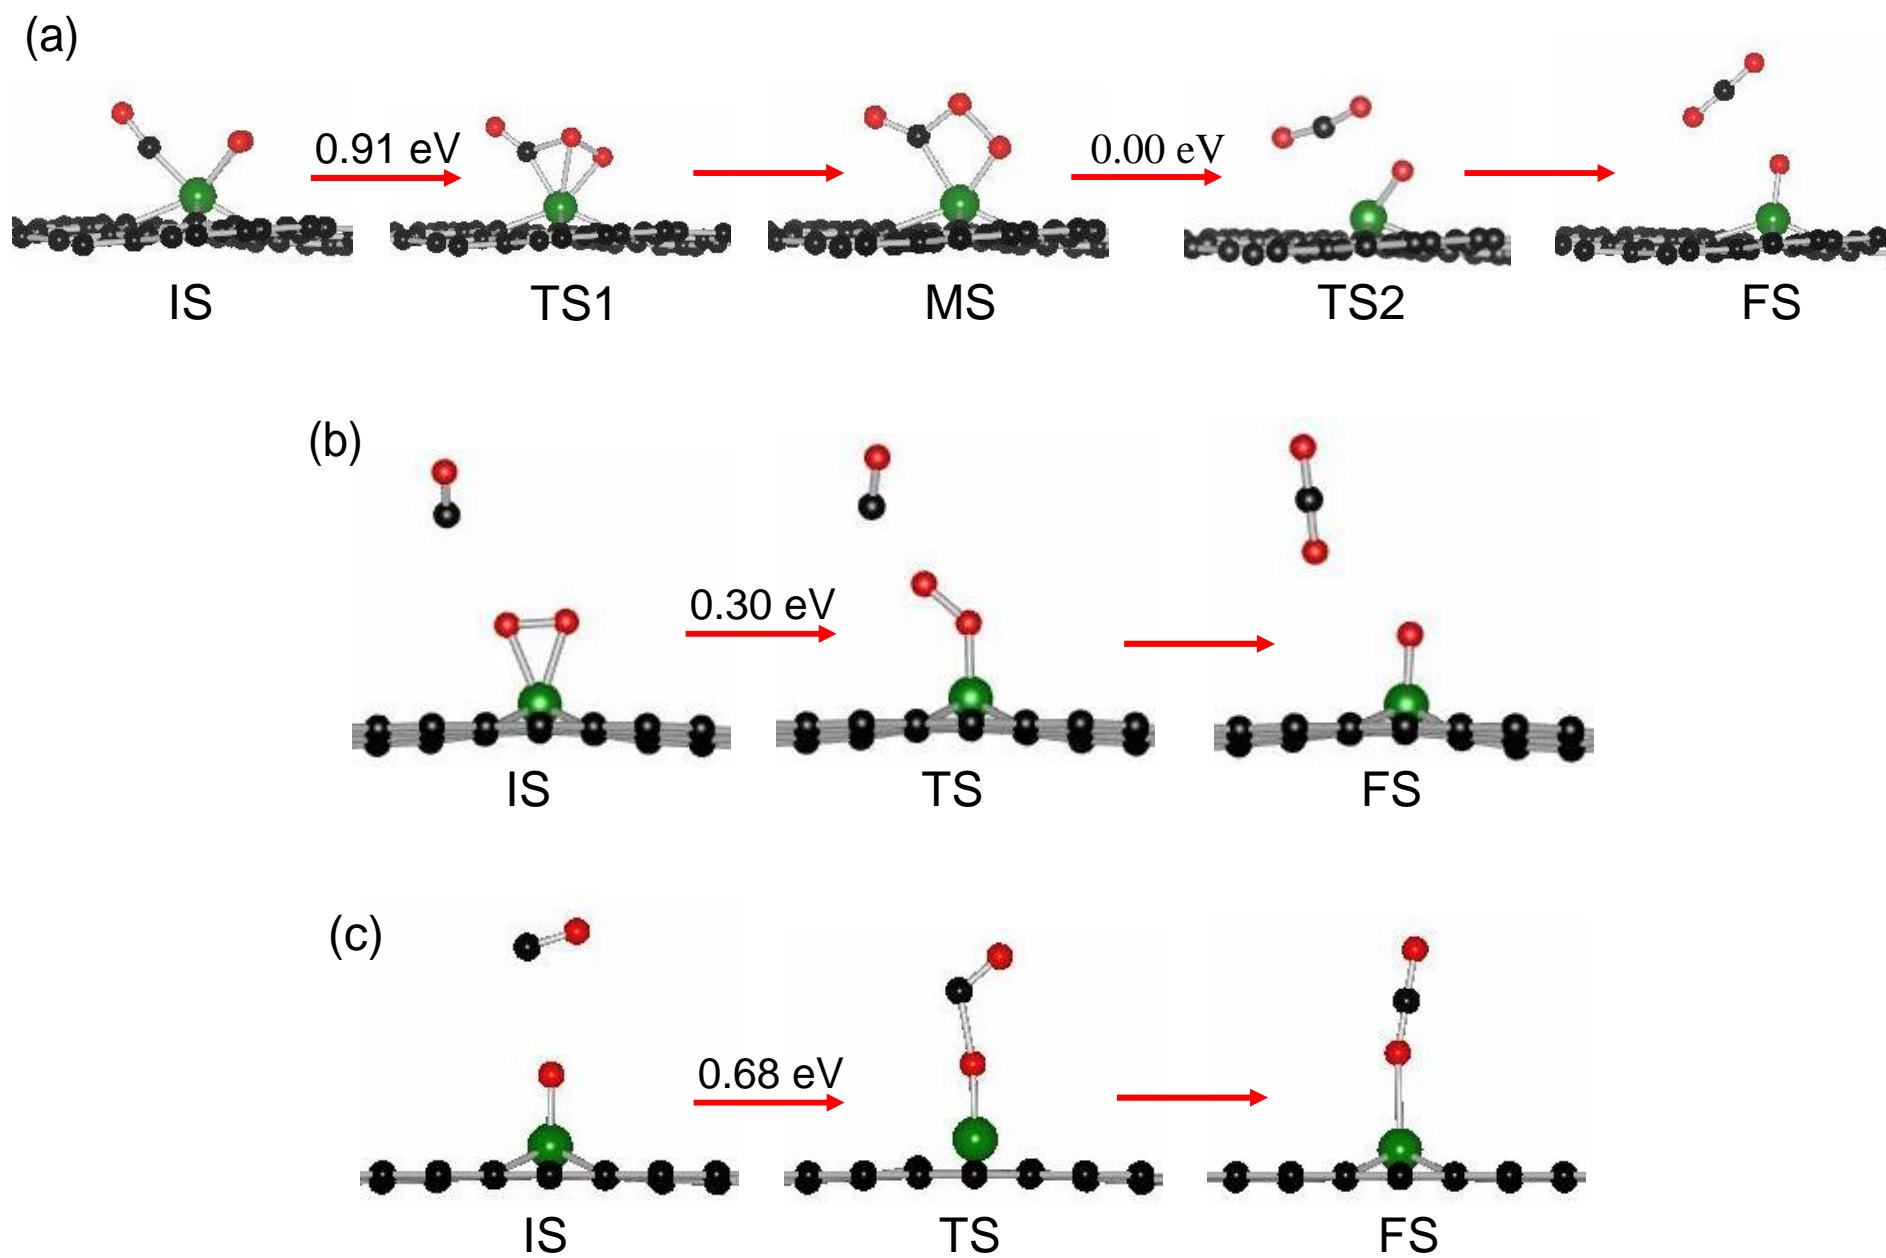

Fig. S1(a)-(c)

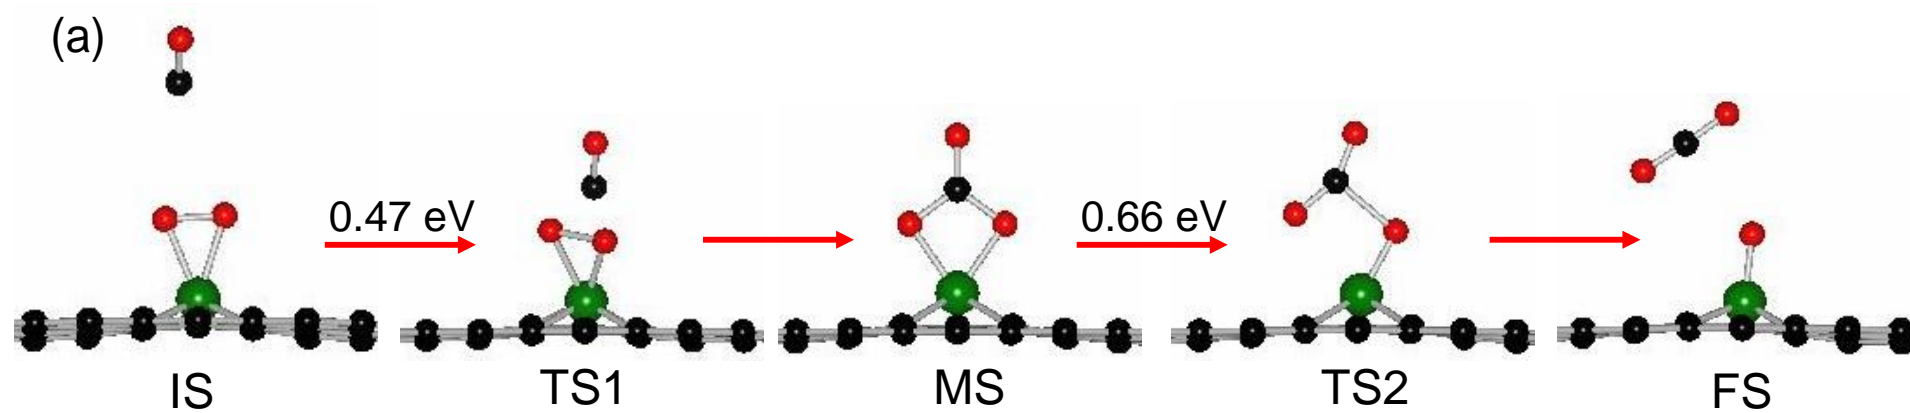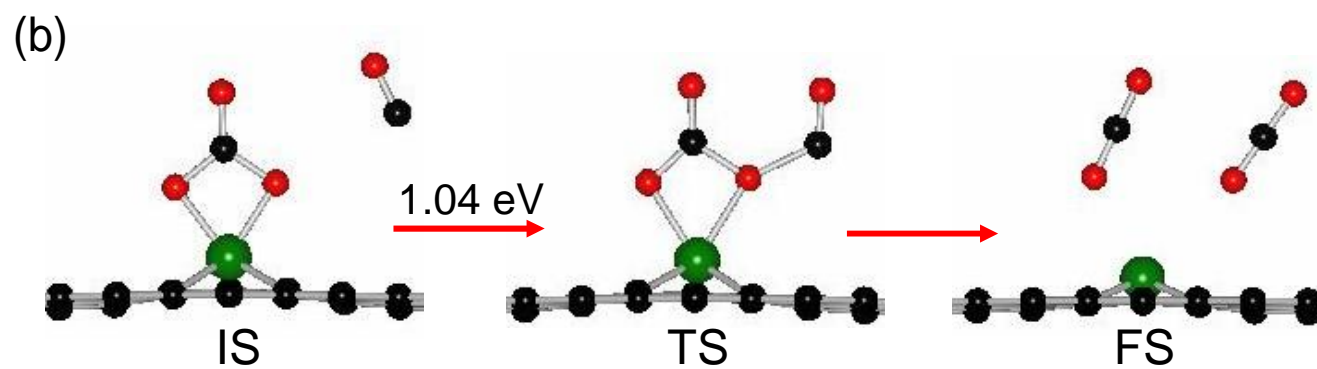

Fig. S2(a)-(b)

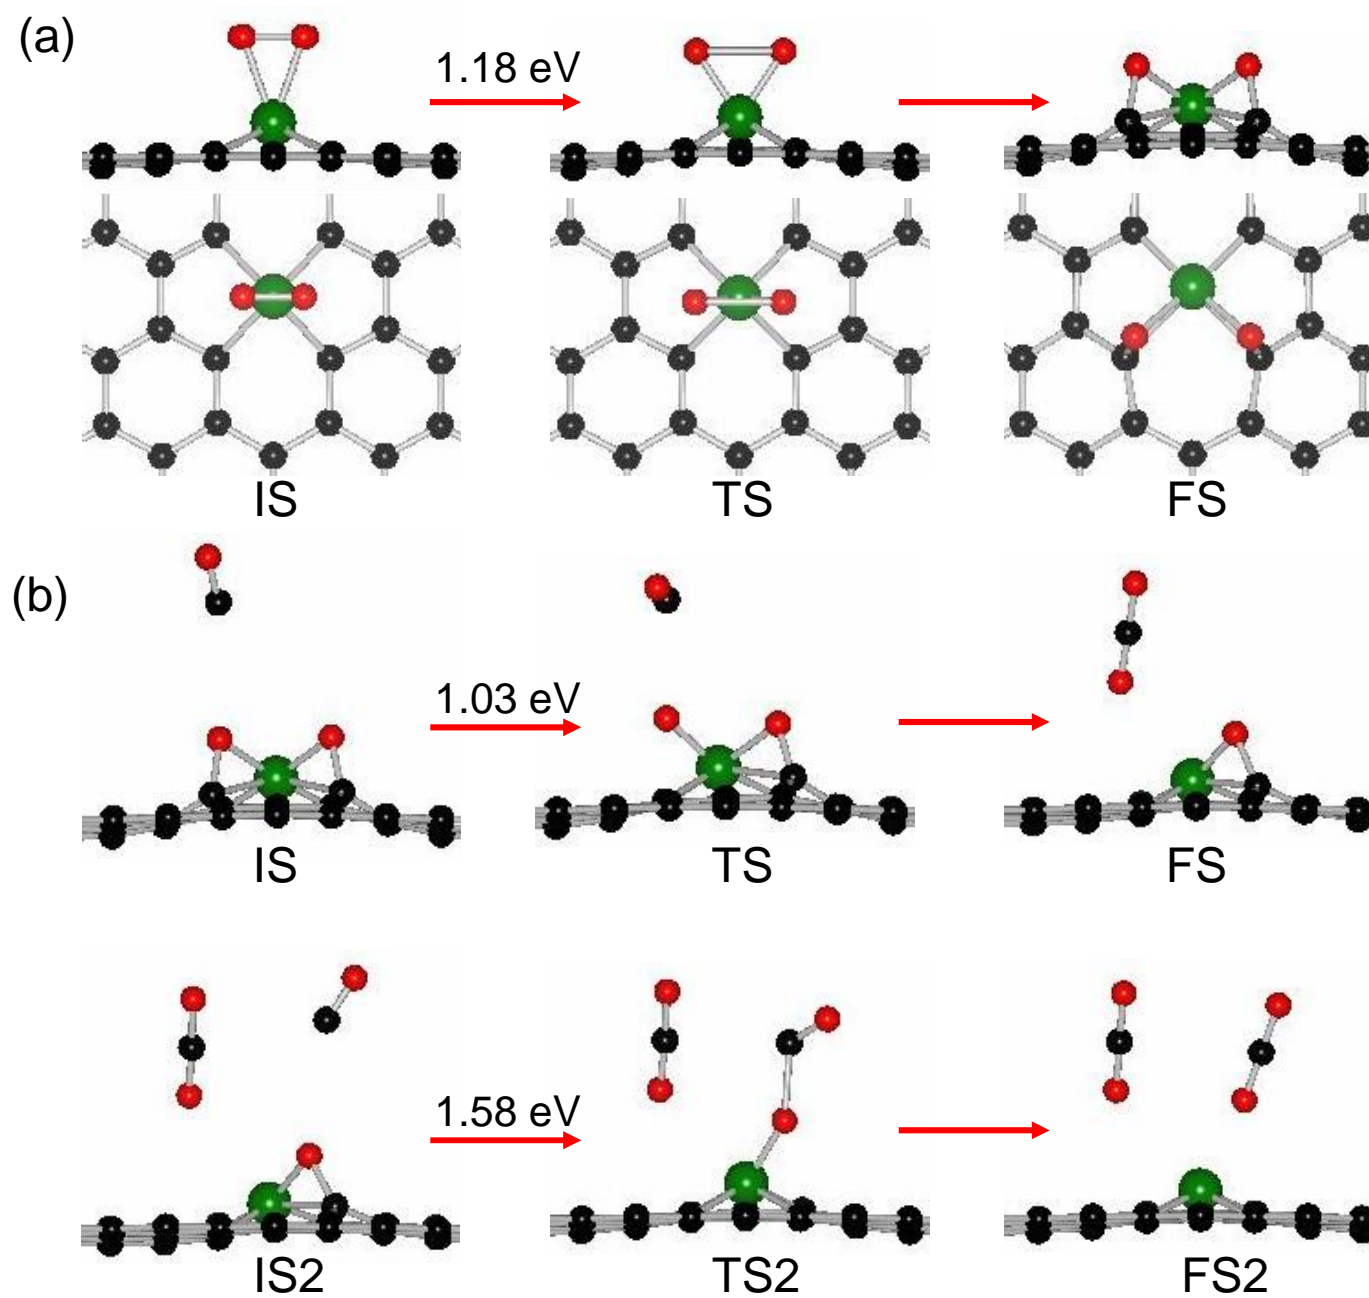

Fig. S3(a)-(c)
